# Supplementary material for: Kinetics and gene diversity of denitrifying biocathode in biological electrochemical systems
Source: Royal Society of Chemistry journal article supplement (doi:10.1039/c7ra04070a), 2017-01-01
Supplement: c7ra04070a1.pdf [file c7ra04070a1.pdf]

**Supplementary Information for**  
**“Kinetics and gene diversity of denitrifying**  
**biocathode in biological electrochemical systems”**

**Authors:**

Yongjia ZHANG,<sup>a</sup> Weiwei XU,<sup>a</sup> Yan XIANG,<sup>a</sup> Beizhen XIE,<sup>b</sup> Hong LIU,<sup>b</sup> Lina WU<sup>c</sup>  
and Dawei LIANG<sup>a,\*</sup>

**Affiliations of authors:**

<sup>a</sup> Beijing Key Laboratory of Bio-inspired Energy Materials and Devices,

School of Space & Environment, Beihang University, Beijing 100191, China

<sup>b</sup> School of Biological Science and Medical Engineering, Beihang University, Beijing  
100191, China

<sup>c</sup> School of Environment and Energy Engineering, Beijing University of Civil  
Engineering and Architecture, Beijing 100044, PR China

**\*Corresponding author:** liangdw@buaa.edu.cn

## Contents

**Table S1** Primers for 16S rRNA and denitrification functional genes high-throughput sequencing

**Figure S1** Relative abundances (%) of dominant 16S rRNA gene in phylum level from biocathodic biofilms with different electron acceptors. Effective sequences were sorted in Mothur utility (<http://www.mothur.org/>) and classified by using RDP's Classifier.

**Figure S2** Relative abundance of four denitrifying functional genes *nirK*, *nirS*, *norB* and *nosZ* with different electron acceptors. Taxa shown in at least one sample with abundance over 1%.

**Table S1** Primers for 16S rRNA and denitrification functional genes high-throughput sequencing

| Primer         | Sequences (5' - 3')          | Reference |
|----------------|------------------------------|-----------|
| <i>nirK</i> -F | GGMATGGTKCCSTGGCA            | 1         |
| <i>nirK</i> -R | GCCTCGATCAGRTRTGG            |           |
| <i>nirS</i> -F | CCTAYTGGCCGCCRCART           | 2         |
| <i>nirS</i> -R | TTCGGRTGSGTCTTGAYGAA         |           |
| <i>norB</i> -F | TGCATCGGTTGCCACACCTGCAGCATC  | 3         |
| <i>norB</i> -R | CCAGTTGAAGTAGGTCTTCTTGTACGGG |           |
| <i>nosZ</i> -F | CGCRACGGCAASAAGGTSMSSGT      | 4         |
| <i>nosZ</i> -R | CAKRTGCAKSGCRTGGCAGAA        |           |
| 16S rRNA-F     | AGAGTTTGATYMTGGCTCAG         | 5         |
| 16S rRNA-R     | TGCTGCCTCCCGTAGGAGT          |           |

**Figure S1** Relative abundances (%) of dominant 16S rRNA gene in phylum level from biocathodic biofilms with different electron acceptors. Effective sequences were sorted in Mothur utility (<http://www.mothur.org/>) and classified by using RDP's Classifier.

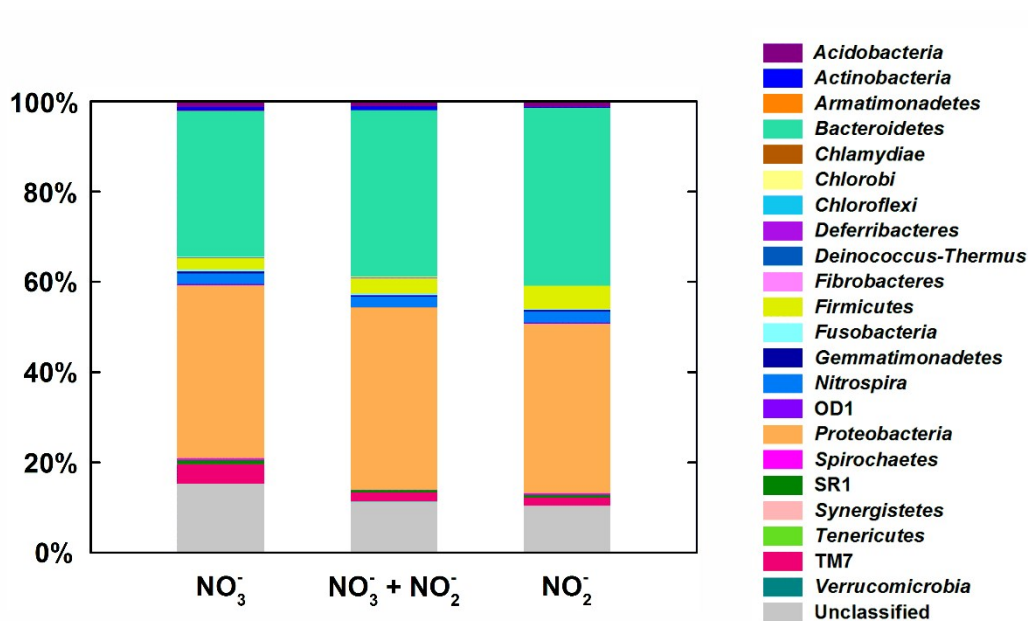

**Figure S2** Relative abundance of four denitrifying functional genes *nirK*, *nirS*, *norB* and *nosZ* with different electron acceptors. Taxa shown in at least one sample with abundance over 1%.

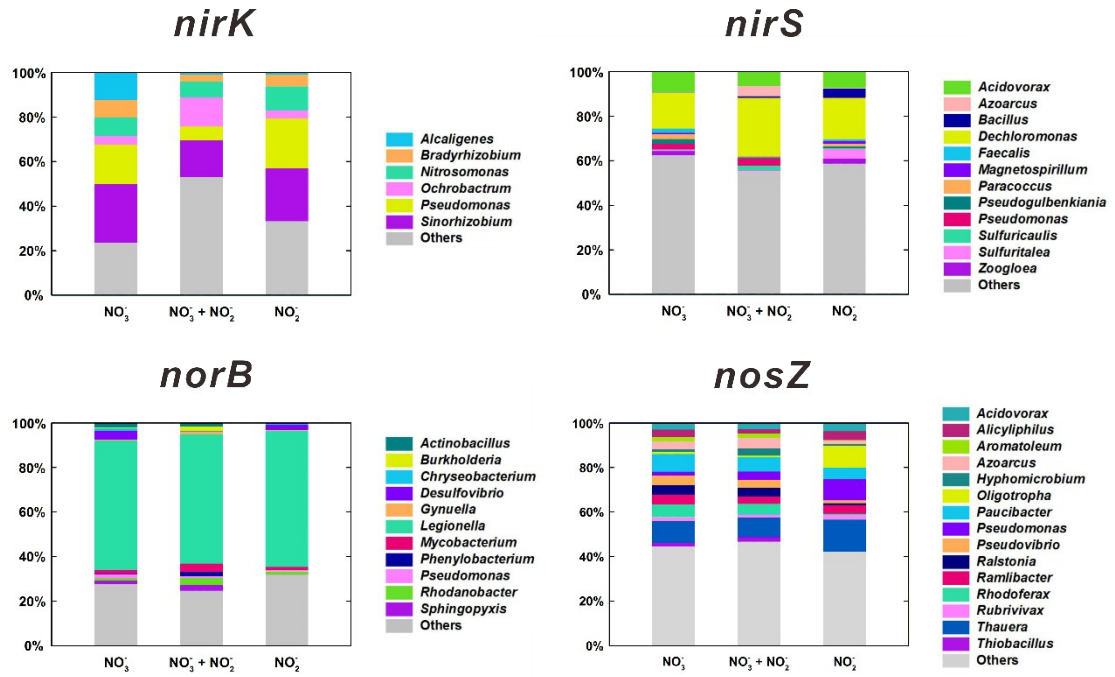

## References

1. S. Hallin and P. E. Lindgren, *Applied & Environmental Microbiology*, 1999, 65, 1652-1657.
2. V. Michotey, V. Mejean and P. Bonin, *Applied and Environmental Microbiology*, 2000, 66, 1564-1571.
3. K. K. Krishnani, *Aquaculture*, 2010, 302, 57-70.
4. S. Henry, D. Bru, B. Stres, S. Hallet and L. Philippot, *Applied and Environmental Microbiology*, 2006, 72, 5181-5189.
5. H. Y. Yu, B. Wu, X. X. Zhang, S. Liu, J. Yu, S. P. Cheng, H. Q. Ren and L. Ye, *Environmental Science & Technology*, 2016, 50, 7189-7197.
